# Supplementary material
Source: MDPI journal article supplement (https://www.mdpi.com/2071-1050/14/21/14000)
Supplement: s1 [file s1]

---

## Supplementary materials

### A Study on Community Public Safety Collaborative Governance Regime in the Background of COVID-19: Empirical Analysis Based on China and South Korea

#### File S1: Survey questionnaire

#### Survey for a study on the Collaborative Governance of Community public safety in China and South Korea under the background of COVID-19

Dear Ms./Mr:

Hello! Thank you for participating in this survey during your busy schedule. This survey is designed to understand the community response to COVID-19 and to study the current state of collaborative governance of community public safety in a pandemic context. We promise to keep all your information strictly confidential, and the questionnaire data will be used for academic research purposes only. Please fill in the form according to your actual situation. We sincerely thank you for your trust and cooperation.

1. You live in a community that feels like home.

|                   | 1                     | 2                     | 3                     | 4                     | 5                     |                |
|-------------------|-----------------------|-----------------------|-----------------------|-----------------------|-----------------------|----------------|
| Strongly disagree | <input type="radio"/> | Strongly agree |

2. Most people in your community are willing to help each other.

|                   | 1                     | 2                     | 3                     | 4                     | 5                     |                |
|-------------------|-----------------------|-----------------------|-----------------------|-----------------------|-----------------------|----------------|
| Strongly disagree | <input type="radio"/> | Strongly agree |

3. You can borrow what you need from your neighbor without any trouble.

| 1                     | 2                     | 3                     | 4                     | 5                     |
|-----------------------|-----------------------|-----------------------|-----------------------|-----------------------|
| <input type="radio"/> |

---

Strongly disagree

Strongly agree

4. You trust the homeowners' committee or neighborhood committee of the community very much.

1 2 3 4 5  
Strongly disagree ☐ ☐ ☐ ☐ ☐ Strongly agree

5. At the beginning of the outbreak, your city established a specialized or temporary body to respond to the outbreak in a timely manner (e.g., an outbreak prevention and control team, an outbreak prevention and solidarity meeting, etc.)

1 2 3 4 5  
Strongly disagree ☐ ☐ ☐ ☐ ☐ Strongly agree

6. You believe that the information and knowledge you received during the outbreak response was adequate for epidemic preparedness.

1 2 3 4 5  
Strongly disagree ☐ ☐ ☐ ☐ ☐ Strongly agree

7. The opinions of medical experts and public advocates are important during this pandemic.

1 2 3 4 5  
Strongly disagree ☐ ☐ ☐ ☐ ☐ Strongly agree

8. Living materials (food, necessities, outbreak protection supplies, etc.) in your community are adequate during this pandemic.

1 2 3 4 5  
Strongly disagree ☐ ☐ ☐ ☐ ☐ Strongly agree

9. Emergency response (Epidemic investigation, isolation and surveillance, epidemic prevention and elimination, etc.) in your community is timely and adequate during this pandemic.

1 2 3 4 5  
Strongly disagree ☐ ☐ ☐ ☐ ☐ Strongly agree

---

10. Medical resources (beds, medications, nucleic acid testing reagents, etc.) in your community are adequate during this pandemic.

|                   |                       |                       |                       |                       |                       |                |
|-------------------|-----------------------|-----------------------|-----------------------|-----------------------|-----------------------|----------------|
|                   | 1                     | 2                     | 3                     | 4                     | 5                     |                |
| Strongly disagree | <input type="radio"/> | Strongly agree |

11. During the period of serious epidemic situation, companies in your city abide by the government's epidemic prevention regulations (such as restrictions on business hours, suspension of production and production, restrictions on the number of visitors, etc.).

|                   |                       |                       |                       |                       |                       |                |
|-------------------|-----------------------|-----------------------|-----------------------|-----------------------|-----------------------|----------------|
|                   | 1                     | 2                     | 3                     | 4                     | 5                     |                |
| Strongly disagree | <input type="radio"/> | Strongly agree |

12. During the period of serious epidemic situation, the guardhouse (property company) in your community strictly checks the identity of the persons entering and exiting and registering the information of the persons entering and exiting.

|                   |                       |                       |                       |                       |                       |                |
|-------------------|-----------------------|-----------------------|-----------------------|-----------------------|-----------------------|----------------|
|                   | 1                     | 2                     | 3                     | 4                     | 5                     |                |
| Strongly disagree | <input type="radio"/> | Strongly agree |

13. During the period of serious epidemic situation, the government department of your city strictly checks the identity of the people entering and exiting and registering the information of the people entering and exiting.

|                   |                       |                       |                       |                       |                       |                |
|-------------------|-----------------------|-----------------------|-----------------------|-----------------------|-----------------------|----------------|
|                   | 1                     | 2                     | 3                     | 4                     | 5                     |                |
| Strongly disagree | <input type="radio"/> | Strongly agree |

14. The government department in your city has carried out effective publicity on epidemic prevention knowledge (such as printing epidemic prevention manuals, banner notices, etc.)

|                   |                       |                       |                       |                       |                       |                |
|-------------------|-----------------------|-----------------------|-----------------------|-----------------------|-----------------------|----------------|
|                   | 1                     | 2                     | 3                     | 4                     | 5                     |                |
| Strongly disagree | <input type="radio"/> | Strongly agree |

15. During the pandemic, you went out less frequently and avoided unnecessary gatherings.

---

|                   |                       |                       |                       |                       |                       |                |
|-------------------|-----------------------|-----------------------|-----------------------|-----------------------|-----------------------|----------------|
|                   | 1                     | 2                     | 3                     | 4                     | 5                     |                |
| Strongly disagree | <input type="radio"/> | Strongly agree |

---

16. Your community has received help from volunteers (travel facilitation, livelihood services, psychological counseling, legal assistance, online education, etc.).

|                   |                       |                       |                       |                       |                       |                |
|-------------------|-----------------------|-----------------------|-----------------------|-----------------------|-----------------------|----------------|
|                   | 1                     | 2                     | 3                     | 4                     | 5                     |                |
| Strongly disagree | <input type="radio"/> | Strongly agree |

---

17. You or your city have received help (materials, money, human resources, etc.) from non-governmental organizations (Charities, Social organizations, etc.).

|                   |                       |                       |                       |                       |                       |                |
|-------------------|-----------------------|-----------------------|-----------------------|-----------------------|-----------------------|----------------|
|                   | 1                     | 2                     | 3                     | 4                     | 5                     |                |
| Strongly disagree | <input type="radio"/> | Strongly agree |

---

18. You are very satisfied with the response speed and follow-up treatment of the companies that have experienced the epidemic.

|                   |                       |                       |                       |                       |                       |                |
|-------------------|-----------------------|-----------------------|-----------------------|-----------------------|-----------------------|----------------|
|                   | 1                     | 2                     | 3                     | 4                     | 5                     |                |
| Strongly disagree | <input type="radio"/> | Strongly agree |

---

19. During home isolation, the government staff in your place of residence provides you with daily services.

|                   |                       |                       |                       |                       |                       |                |
|-------------------|-----------------------|-----------------------|-----------------------|-----------------------|-----------------------|----------------|
|                   | 1                     | 2                     | 3                     | 4                     | 5                     |                |
| Strongly disagree | <input type="radio"/> | Strongly agree |

---

20. During the pandemic, your community's homeowners committee helped to respond to COVID-19.

|                   |                       |                       |                       |                       |                       |                |
|-------------------|-----------------------|-----------------------|-----------------------|-----------------------|-----------------------|----------------|
|                   | 1                     | 2                     | 3                     | 4                     | 5                     |                |
| Strongly disagree | <input type="radio"/> | Strongly agree |

---

21. During the pandemic, the residents of the community have helped you.

Strongly disagree      1      2      3      4      5      Strongly agree

---

28. What is your nationality

- ☐ South Korea ☐ China

29. What is your gender?

- ☐ Male ☐ Female

30. What year are you currently in college? (Single-choice question)

- ☐ First year ☐ Second year  
☐ Third year ☐ Fourth year

31. What is the total annual income of you and your family members (including salary, bonus and other income) ? (Single-choice question)

- Korea ☐ less than 20 million (KRW); ☐ 20-40 million (KRW);  
☐ 40-80 million (KRW); ☐ 80-12 million (KRW);  
☐ 120 million or more (KRW);
- China ☐ less than 50,000 (RMB) ☐ 50,000-100,000 (RMB)  
☐ 100,000- 300,000 (RMB) ☐ 300,000-500,000 (RMB)  
☐ 500,000 or more (RMB)

32. Have you confirmed to be infected with Covid-19?

- ☐ Yes ☐ NO

---

## **File S2: Interview outlines**

# **Outline of the interview on "A comparative study on the collaborative governance mechanism of community public safety in China and Korea in the context of COVID-19"**

### **I. Purpose of the interview**

To understand the actual situation of COVID-19 response by multiple subjects of community collaborative governance

### **II. Interview method**

Face-to-face

### **III. Interviewees**

Chinese and Korean community workers involved in outbreak prevention and control (including government workers, community volunteers, community property company workers, members of community self-governance organizations, **NGO staff**, community residents, etc.)

### **IV. Outline of questions**

#### **(I) Opening statement of the interview**

Hello, I am a social science researcher. I am now doing a survey on the topic of collaborative governance of community public safety in the context of COVID-19, and I will take up to 5 minutes of your precious time to complete this interview. This interview will be conducted mainly through a question-and-answer format, and the content of the interview will be kept strictly confidential! To ensure the validity of the interview, please answer each question truthfully, and if there are no questions, let's get started!

#### **(II) Interview Dialogue**

##### **Part I: Dialogue section**

1. What is your main responsibility in the epidemic prevention and control work? Please tell us more about it.

---

2. In the course of your work, what is the relationship (e.g., in terms of mutual help and understanding) among the residents of the community in which you work? What is their attitude toward the epidemic prevention and control policy? What impact did this have on the outbreak prevention and control efforts?

3. How did the community in which you worked carry out self-help efforts in the face of a sudden outbreak at the earliest stage of the outbreak, before a unified response was established?

4. When the country initiated emergency response procedures and formed a collaborative governance body, did your outbreak prevention and control efforts change in any way? What exactly was it like?

5. Who else was involved in the epidemic prevention and control process? What kind of work did they do?

6. Were there enough supplies (food, necessities, epidemic protection) in the community where you worked during the epidemic?

7. Are there enough medical resources (beds, medicines, nucleic acid testing reagents, etc.) in your community during the epidemic prevention and control process?

8. What do you do when you encounter problems such as lack of workforce or shortage of supplies at work?

9. What do you think is the role of the government among the many players in the whole epidemic prevention and control?

10. What specific suggestions do you have for good collaborative governance of community public safety?

Part II: Conclusion of the interview

Thank you again for your cooperation, and I wish you good health and good work!

#### **IV. Interview steps**

1. Observe the interview site
2. Explain the reason for the interview with the interviewee
3. Start the interview and record
4. Reflection and evaluation of the interview

#### **V. Problems that may be encountered**

1. The interviewee refuses to answer



- 
2. The interviewer is disturbed
  3. Impatience of the interviewee in the interview process
  4. Interrupted by a third party in the interview process
  5. Interviewee's perfunctory answers

#### **VI. Envisaged solutions**

1. Select the appropriate interviewees, test observation selected for easy access, clearly inform them of our purpose

2. Select the appropriate timing of the interview
3. Try to stand in the perspective of the interviewee, try to save time

4. Interviews can also be conducted on a one-to-many basis, forming a communication group format

- 5.) If the subject answers perfunctorily, you should actively guide the interview, not to end the interview as soon as possible, and the interview will be invalidated

#### **VII. Interview notes**

1. Interviews should be fully prepared before
2. Interviews should pay attention to dress and instrumentation, kind and generous attitude; be civilized and polite, appropriate wording

3. Respect the interviewees and pay attention to protecting their information security and personal privacy

4. Take it seriously, do not go through the motions, and really achieve the purpose of the study through the interview

#### **VIII. Remarks on the equipment to be brought before the interview**

1. books, pens and relevant personal documents
2. Recording equipment
3. Interview outline
